# Supplementary material
Source: Springer Nature journal article supplement (https://www.springermedizin.de/resource/supplementary/12955_2010_711_MOESM3_ESM.pdf/9561156)
Supplement: MOESM3 [file 9561156]

# Dimensions of Disability (comprised of 72 categories)

**Symptoms /  
Impairments**  
44 categories

**Difficulties with  
Day-to-Day  
Activities**  
22 categories

**Challenges to Social  
Inclusion**  
4 categories

**Uncertainty**  
2 categories

**Adverse  
Effects  
Of HIV or  
Meds**  
(Fatigue,  
Diarrhea,  
Nausea,  
Pain,  
weakness,  
etc.)  
31 categories

**Stress,  
Anxiety, and  
Depression**  
2 categories

**Fear,  
Decreased  
Self Esteem,  
Shame or  
Embarrassment,  
Loneliness**  
11 categories

**Standing,  
Walking,  
Stairs,  
Transfers,  
Activities of  
Daily Living,  
Household  
Chores, etc.**  
22 categories

**Parental Roles,  
Work and School,  
Personal  
Relationships,  
Other  
Social  
Roles and  
Activities**  
4 categories

**Worrying about  
the Future and  
Impact of  
Uncertainty on  
Life Decisions**  
2 categories
